# Supplementary material
Source: publisher figshare collection journal article supplement (https://acs.figshare.com/ndownloader/files/3800683)
Supplement: Supplementary file 1 [file 3800683]

SMILES	Compound ID	Src IC50 (uM)	MDA-MB-231 Anti-viability IC50 (uM)	HepG2 Anti-viability IC50 (uM)
CC(C=CC(C(NC1=CC(C(F)(F)F)=C(CN2CCN(C)CC2)C=C1)=O)=C3)=C3C#CC4=NN(C(C)C)C5=C4C(N)=NC=N5	1a	0.002	0.069¡À0.004	>5
CC(C=CC(C(NC1=CC=C(CN2CCN(C)CC2)C=C1)=O)=C3)=C3C#CC4=NN(C(C)C)C5=C4C(N)=NC=N5	1b	0.004	0.270¡À0.020	4.700¡À0.096
CC(C=CC(C(NC1=CC(Cl)=C(CN2CCN(C)CC2)C=C1)=O)=C3)=C3C#CC4=NN(C(C)C)C5=C4C(N)=NC=N5	1c	0.002	0.057¡À0.010	3.536¡À0.102
CC(C=CC(C(NC1=CC(Br)=C(CN2CCN(C)CC2)C=C1)=O)=C3)=C3C#CC4=NN(C(C)C)C5=C4C(N)=NC=N5	1d	0.001	0.040¡À0.008	1.828¡À0.067
CC(C=CC(C(NC1=CC=CC(C(F)(F)F)=C1)=O)=C2)=C2C#CC3=NN(C(C)C)C4=C3C(N)=NC=N4	1e	0.003	0.103¡À0.009	>5
CC(C=CC(C(NC1=CC(C(F)(F)F)=C(CN2CCOCC2)C=C1)=O)=C3)=C3C#CC4=NN(C(C)C)C5=C4C(N)=NC=N5	1f	0.021	1.515¡À0.005	>5
CC(C=CC(C(NC1=CC(C(F)(F)F)=C(CN2CCN(CC)CC2)C=C1)=O)=C3)=C3C#CC4=NN(C(C)C)C5=C4C(N)=NC=N5	1g	0.002	0.056¡À0.005	>5
CC(C=CC(C(NC1=CC(C(F)(F)F)=C(CN2CCN(CCO)CC2)C=C1)=O)=C3)=C3C#CC4=NN(C(C)C)C5=C4C(N)=NC=N5	1h	0.004	0.050¡À0.004	1.772¡À0.060
O=C(NC1=CC=C(CN2CCN(C)CC2)C(C(F)(F)F)=C1)C3=CC=C(C)C(C#CC4=CN=C5C=CC=NN54)=C3	Ponatinib	0.003	0.156¡À0.014	>5
O=C(C1=CN=C(NC2=NC(C)=NC(N3CCN(CCO)CC3)=C2)S1)NC4=C(C)C=CC=C4Cl	Dasatinib	0.0003	0.178¡À0.021	>5
CC(C=CC(C(NC1=CC(C(F)(F)F)=C(CN2CCN(C)CC2)C=C1)=O)=C3)=C3C#CC4=NN(C)C5=C4C(N)=NC=N5	1i	0.007	0.020¡À0.003	>5
CC(C=CC(C(NC1=CC(C(F)(F)F)=C(CN2CCN(C)CC2)C=C1)=O)=C3)=C3C#CC4=NN(CC)C5=C4C(N)=NC=N5	1j	0.0009	0.011¡À0.001	>5
CC(C=CC(C(NC1=CC(C(F)(F)F)=C(CN2CCN(C)CC2)C=C1)=O)=C3)=C3C#CC4=NN(C5CCC5)C6=C4C(N)=NC=N6	1k	0.009	0.028¡À0.003	>5
CC(C=CC(C(NC1=CC(C(F)(F)F)=C(CN2CCN(C)CC2)C=C1)=O)=C3)=C3C#CC4=NN(C5CCCC5)C6=C4C(N)=NC=N6	1l	0.019	0.065¡À 0.003	>5
CC(C=CC(C(NC1=CC(C(F)(F)F)=C(CN2CCN(C)CC2)C=C1)=O)=C3)=C3C#CC4=NN(COC)C5=C4C(N)=NC=N5	1m	0.008	0.051¡À 0.003	>5
CC(C=CC(C(NC1=CC(C(F)(F)F)=C(CN2CCN(C)CC2)C=C1)=O)=C3)=C3C#CC4=NN([C@H]5CCOC5)C6=C4C(N)=NC=N6	1n	0.007	0.016¡À0.001	>5
CC(C=CC(C(NC1=CC(C(F)(F)F)=C(CN2CCN(C)CC2)C=C1)=O)=C3)=C3C#CC4=NN([C@@H]5CCOC5)C6=C4C(N)=NC=N6	1o	0.007	0.022¡À 0.001	>5
CC(C=CC(C(NC1=CC(C(F)(F)F)=C(CN2CCN(C)CC2)C=C1)=O)=C3)=C3C#CC4=NN(C5CCN(C(OC(C)(C)C)=O)CC5)C6=C4C(N)=NC=N6	1p	nd	0.145¡À0.011	>5
CC(C=CC(C(NC1=CC(C(F)(F)F)=C(CN2CCN(C)CC2)C=C1)=O)=C3)=C3C#CC4=NN(C5CCNCC5)C6=C4C(N)=NC=N6	1q	0.012	0.050¡À 0.005	>5
CC(C=CC(C(NC1=CC(C(F)(F)F)=C(CN2CCN(C)CC2)C=C1)=O)=C3)=C3C#CC4=NN(C5CCN(C(C=C)=O)CC5)C6=C4C(N)=NC=N6	1r	0.015	0.014¡À 0.0009	>5
[H]C(C=CC(C(NC1=CC(C(F)(F)F)=C(CN2CCN(C)CC2)C=C1)=O)=C3)=C3C#CC4=NN(CC)C5=C4C(N)=NC=N5	14a	0.005	0.024¡À0.002	>5
ClC(C=CC(C(NC1=CC(C(F)(F)F)=C(CN2CCN(C)CC2)C=C1)=O)=C3)=C3C#CC4=NN(CC)C5=C4C(N)=NC=N5	14b	0.011	0.052¡À0.004	>5
O=C(NC1=CC(C(F)(F)F)=C(CN2CCN(C)CC2)C=C1)C3=CC(C#CC4=NN(CC)C5=C4C(N)=NC=N5)=C(CC)C=C3	14c	0.083	0.418¡À0.029	>5
O=C(NC1=CC(C(F)(F)F)=C(CN2CCN(C)CC2)C=C1)C3=CC(C#CC4=NN(CC)C5=C4C(N)=NC=N5)=C(C(C)C)C=C3	14d	1.409	1.225¡À0.090	>5
FC(C=CC(C(NC1=CC(C(F)(F)F)=C(CN2CCN(C)CC2)C=C1)=O)=C3)=C3C#CC4=NN(CC)C5=C4C(N)=NC=N5	14e	nd	1.743¡À0.222	>5
O=C(NC1=CC(C(F)(F)F)=C(CN2CCN(C)CC2)C=C1)C3=CC(C#CC4=NN(CC)C5=C4C(N)=NC=N5)=C(OC)C=C3	14f	0.059	0.321¡À0.041	4.640¡À0.387
OC(C=CC(C(NC1=CC(C(F)(F)F)=C(CN2CCN(C)CC2)C=C1)=O)=C3)=C3C#CC4=NN(CC)C5=C4C(N)=NC=N5	14g	3.191	>5	>5
